# Supplementary material for: Classification of node-positive melanomas into prognostic subgroups using keratin, immune, and melanogenesis expression patterns
Source: PubMed Central journal article supplement (PMC7946641; doi:10.1038/s41388-021-01665-0), 2021-02-09
Supplement: 41388_2021_1665_MOESM1_ESM.pdf [file 41388_2021_1665_MOESM1_ESM.pdf]

# Supplementary Information

## Classification of node-positive melanomas into prognostic subgroups using keratin, immune and melanogenesis expression patterns

**Dvir Netanel<sup>1</sup>, Stav Leibou<sup>2</sup>, Roma Parikh<sup>2</sup>, Neta Stern<sup>1</sup>, Hananya Vaknine<sup>3</sup>, Ronen Brenner<sup>3</sup>, Sarah Amar<sup>3</sup>, Rivi Haiat Factor<sup>4</sup>, Tomer Perluk<sup>4</sup>, Jacob Frand<sup>4</sup>, Eran Nizri<sup>5,2</sup>, Dov Hershkovitz<sup>6,2</sup>, Valentina Zemser-Werner<sup>6</sup>, Carmit Levy<sup>2</sup>, Ron Shamir<sup>1\*</sup>**

<sup>1</sup>Blavatnik School of Computer Science, Tel Aviv University, Tel Aviv, Israel

<sup>2</sup>Sackler Faculty of Medicine, Tel Aviv University, Tel Aviv, Israel

<sup>3</sup>Department of Oncology, Edith Wolfson Medical Center, Holon, Israel

<sup>4</sup>Department of Plastic and Reconstructive Surgery, Edith Wolfson Medical Center, Holon, Israel

<sup>5</sup>Department of Surgery A, Tel Aviv Sourasky Medical Center, Tel Aviv, Israel

<sup>6</sup>Institute of Pathology, Tel Aviv Sourasky Medical Center, Tel Aviv, Israel

\*Corresponding author, e-mail: rshamir@tau.ac.il

# Supplementary Information - Section 1

## Supplementary Figures and Tables

|                                |                                           | Cluster 1  | Cluster 2 | Cluster 3  | Cluster 4  | Total      |
|--------------------------------|-------------------------------------------|------------|-----------|------------|------------|------------|
| Sample number                  |                                           | <b>105</b> | <b>68</b> | <b>118</b> | <b>118</b> | <b>469</b> |
| Tissue site                    | <b>Primary Tumor</b>                      | 16         | 53        | 10         | 25         | <b>104</b> |
|                                | <b>Regional Cutaneous or Subcutaneous</b> | 21         | 6         | 32         | 15         | <b>74</b>  |
|                                | <b>Regional Lymph Node</b>                | 115        | 2         | 57         | 49         | <b>223</b> |
|                                | <b>Distant Metastasis</b>                 | 13         | 7         | 19         | 29         | <b>68</b>  |
| TCGA's Transcriptomic subtypes | <b>Immune</b>                             | 114        | 2         | 34         | 18         | <b>168</b> |
|                                | <b>Keratin</b>                            | 1          | 41        | 2          | 56         | <b>100</b> |
|                                | <b>MITF-Low</b>                           | 0          | 0         | 57         | 2          | <b>59</b>  |
|                                | <b>NA</b>                                 | 50         | 23        | 25         | 41         | <b>139</b> |

**Table S1: Characterization of the four melanoma subgroups.**

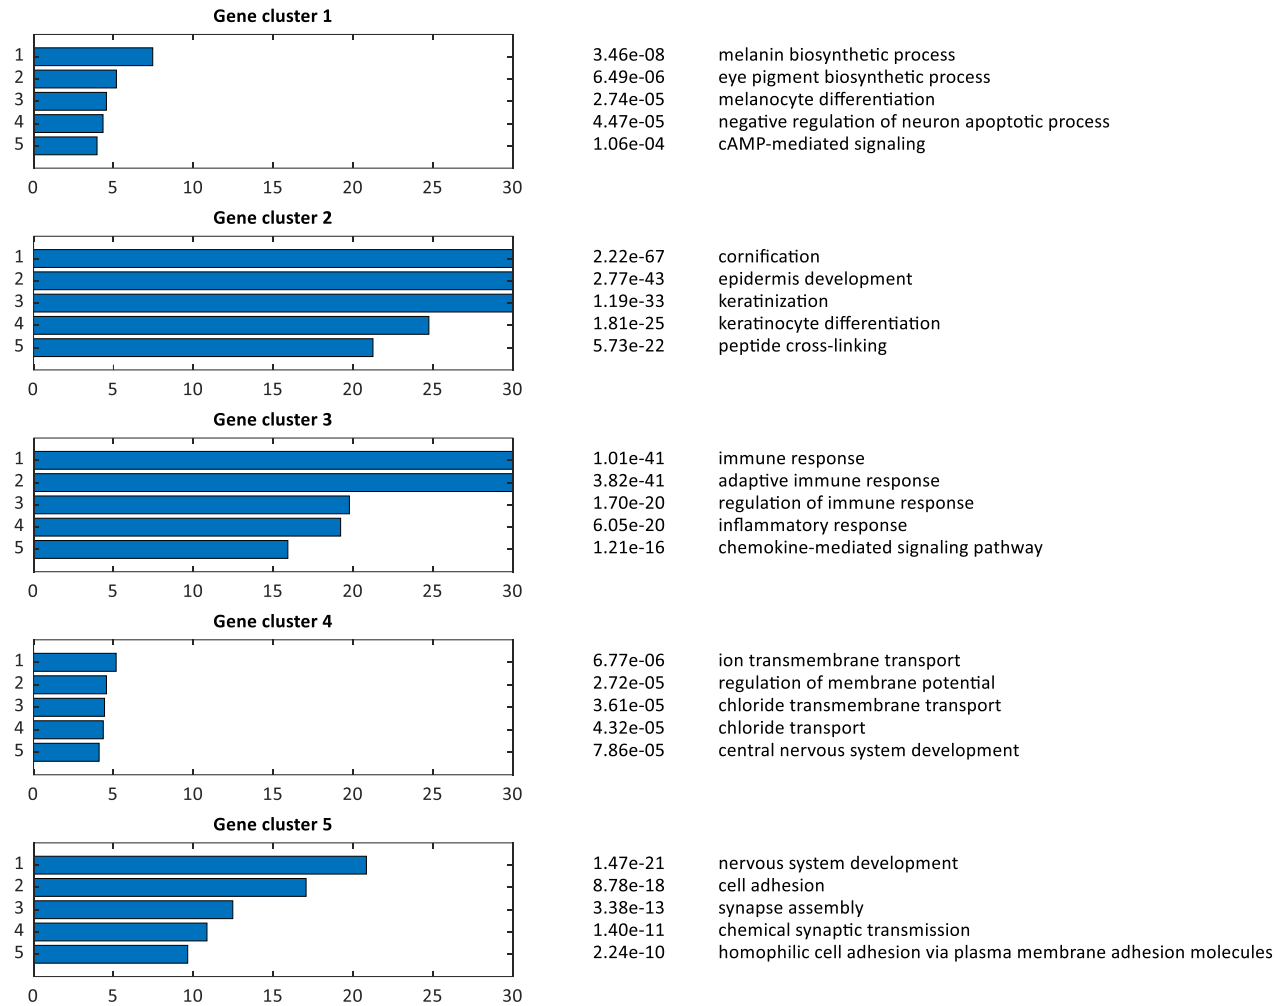

**Figure S1: Gene Ontology enrichments on the five gene clusters.** The analysis was performed in PROMO<sup>1</sup>. The five most significant GO terms, along with their FDR-corrected hypergeometric test p-values are listed for each gene cluster. Gene clusters 1, 2, and 3 were significantly enriched for melanogenesis, keratinization, and immune GO terms, respectively.

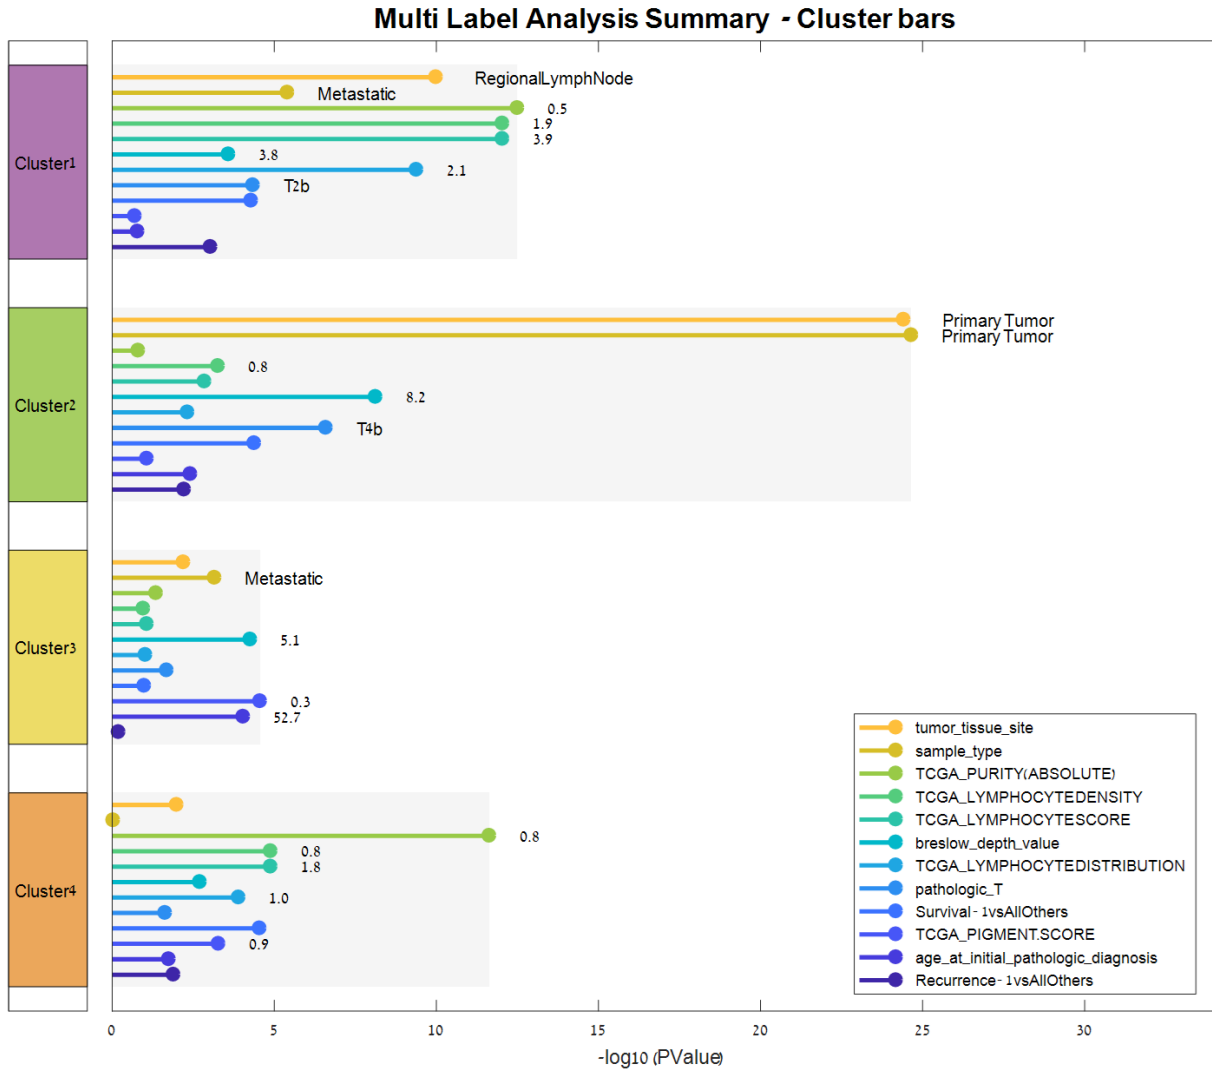

**Figure S2: Enrichment for clinical labels on the four melanoma sample clusters.** The analysis was performed using PROMO's multi-label sample-cluster analysis<sup>1</sup>, which scanned all the clinical labels available for the samples and identified significant label enrichments for each sample cluster. P-values are significance of enrichments after FDR correction. Sample cluster 2 was significantly enriched for primary tumors.

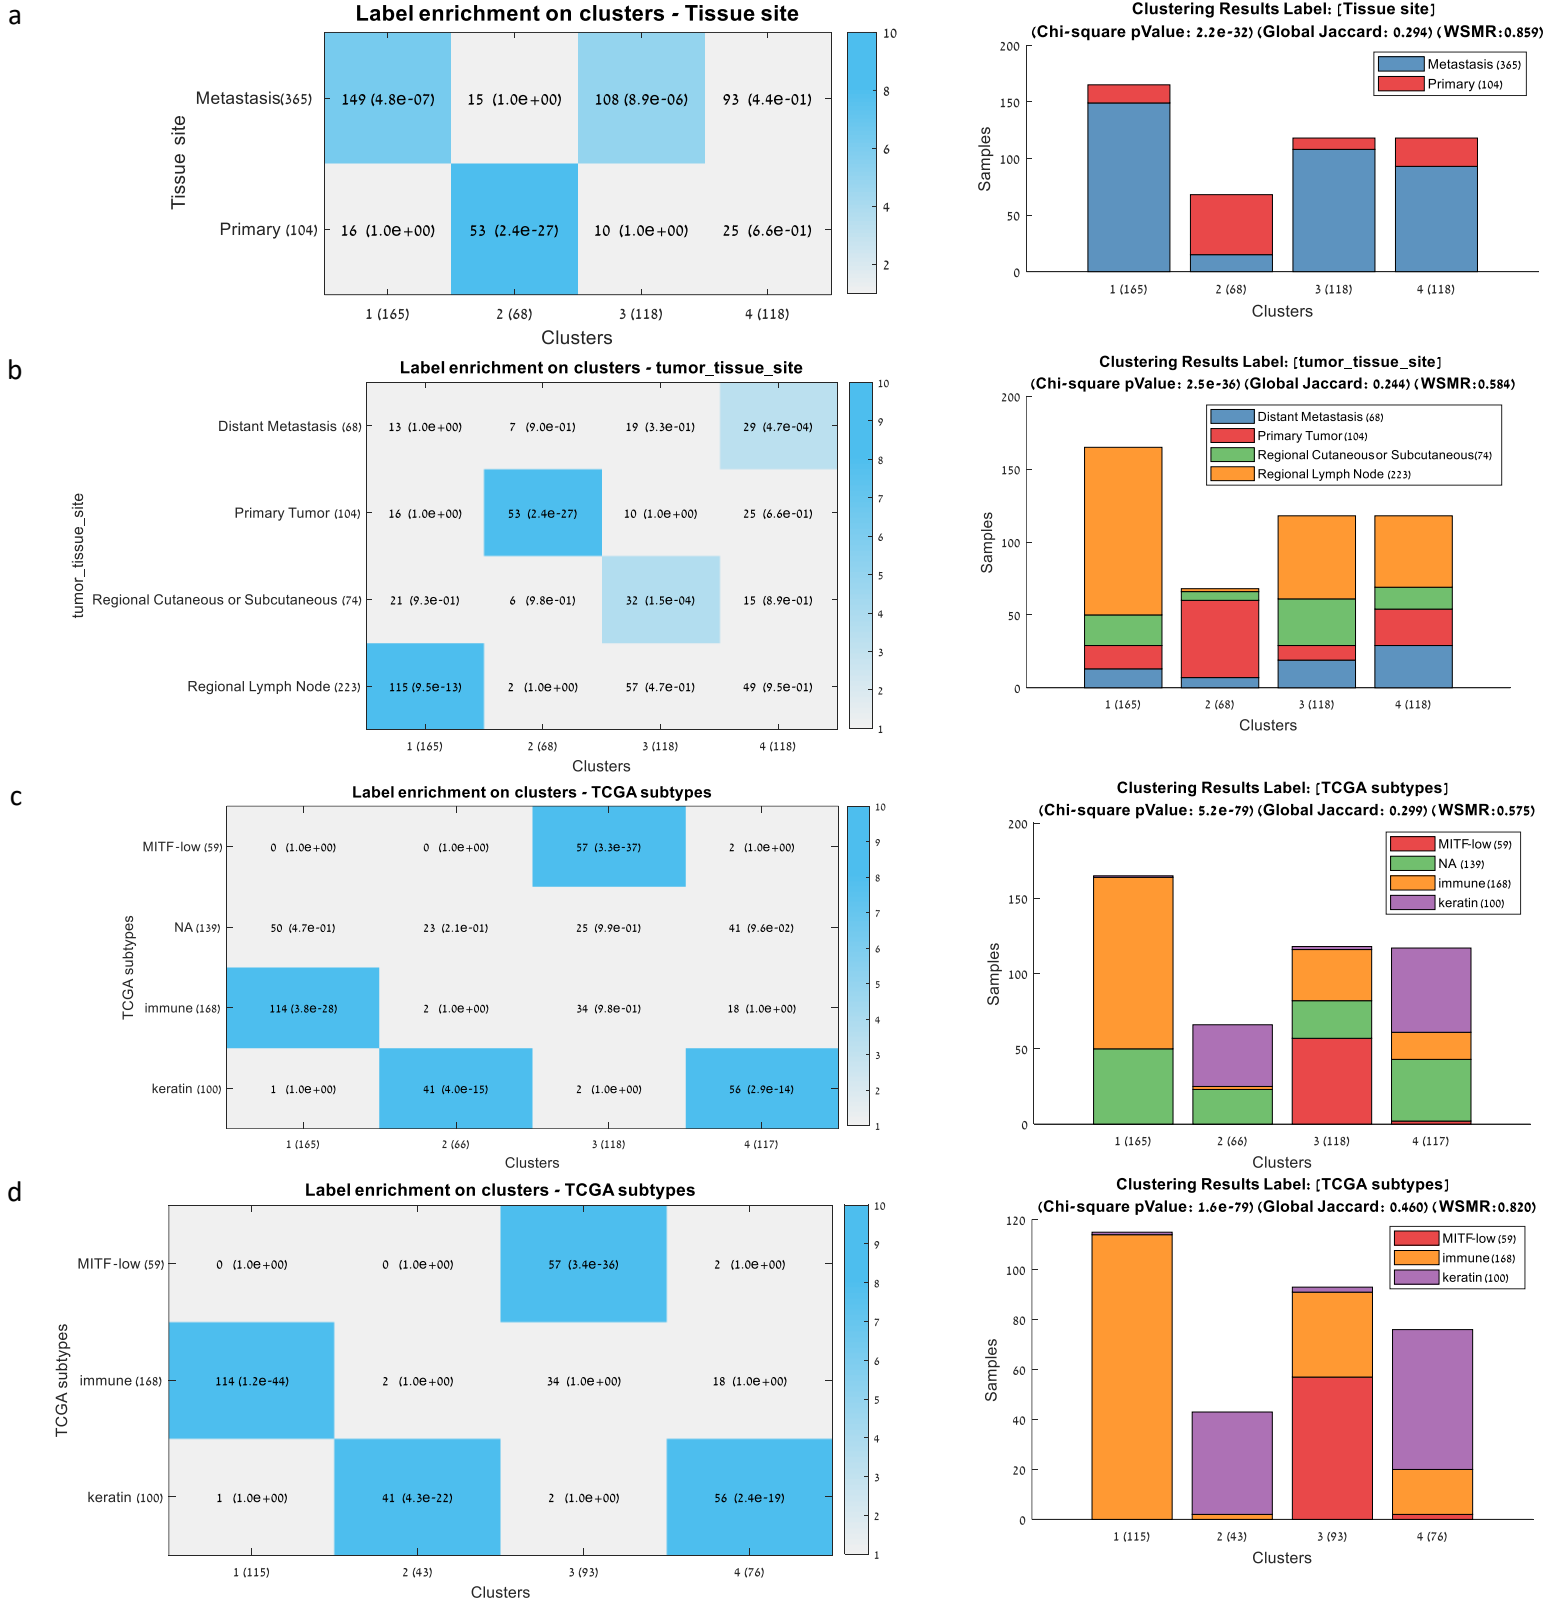

**Figure S3: Characteristics of the four melanoma subtypes.** Concordance between the four melanoma subgroups, tumor tissue sites, and TCGA's three transcriptomic subgroup labels. For each comparison, the histogram on the right shows the breakdown of samples in each subtype into categories, and the matrix on

the left shows the confusion matrix. For each cell, the number of samples and FDR-corrected p-value for enrichment based on the hypergeometric test is shown. Color scale is  $-\log_{10}(\text{p-value})$ . **(a)** Primary vs. Metastasis **(b)** Detailed tissue site **(c)** TCGA's three transcriptomic subtypes, including NA value for new samples that were not included in TCGA's melanoma paper<sup>2</sup> **(d)** TCGA's three transcriptomic subtypes, omitting the NA samples.







| Gene Cluster                      | KEGG Pathway                                           | #genes   | Raw p-value | Corrected p-value | Enrichment factor                                                                                              | Gene list                                                                                                                                                                                                                                                    |
|-----------------------------------|--------------------------------------------------------|----------|-------------|-------------------|----------------------------------------------------------------------------------------------------------------|--------------------------------------------------------------------------------------------------------------------------------------------------------------------------------------------------------------------------------------------------------------|
| 1                                 | Melanogenesis                                          | 9        | 7.25E-05    | 0.00414           | 5.07                                                                                                           | [IGNA01, DCT, KIT, TYRP1, FZD9, ADCY2, ADCY1, TYR, WNT4]                                                                                                                                                                                                     |
|                                   | Calcium signaling pathway                              | 10       | 0.00119     | 0.0442            | 3.22                                                                                                           | [RYR1, CHRM1, GNAL, CACNA1B, ATP2B3, CACNA1D, ADCY2, ADCY1, MYLK3, CACNA1H]                                                                                                                                                                                  |
|                                   | Maturity onset diabetes of the young                   | 4        | 8.83E-04    | 0.0357            | 9.11                                                                                                           | [PKLR, ONECUT1, MNX1, NKX2-2]                                                                                                                                                                                                                                |
| 3                                 | Natural killer cell mediated cytotoxicity              | 17       | 3.07E-11    | 3.52E-09          | 8.19                                                                                                           | [KLR2, PRKCB, SH2D1A, PRF1, GZMB, FASLG, ITGAL, HLA-G, KIR2DL4, PIK3CG, ZAP70, KLRK1, IFNG, LCK, KLRD1, CD48, CD247]                                                                                                                                         |
|                                   | Graft-versus-host disease                              | 12       | 6.87E-13    | 9.53E-11          | 19.2                                                                                                           | [HLA-DRB5, IFNG, IL1B, PRF1, GZMB, FASLG, KLRD1, HLA-DOA, HLA-DQA2, HLA-G, HLA-DOB, HLA-DQA1]                                                                                                                                                                |
|                                   | B cell receptor signaling pathway                      | 8        | 1.87E-05    | 0.00129           | 6.99                                                                                                           | [CD79B, CD79A, CR2, PRKCB, CD19, CARD11, CD22, PIK3CG]                                                                                                                                                                                                       |
|                                   | Allograft rejection                                    | 10       | 1.44E-10    | 1.39E-08          | 17.7                                                                                                           | [HLA-DRB5, IFNG, PRF1, GZMB, FASLG, HLA-DOA, HLA-DQA2, HLA-G, HLA-DOB, HLA-DQA1]                                                                                                                                                                             |
|                                   | Primary immunodeficiency                               | 14       | 4.83E-17    | 1.56E-14          | 26.2                                                                                                           | [CITA, TNFRSF13B, IL2RG, CD3E, CD3D, CD79A, ZAP70, PTPRC, CD8B, LCK, CD8A, CD19, IL7R, ICOS]                                                                                                                                                                 |
|                                   | Leukocyte transendothelial migration                   | 8        | 3.87E-04    | 0.0171            | 4.56                                                                                                           | [ITK, NCF1, ITGA4, PRKCB, RHOB, ITGAL, MMP9, PIK3CG]                                                                                                                                                                                                         |
|                                   | Hematopoietic cell lineage                             | 21       | 1.12E-19    | 5.41E-17          | 15.8                                                                                                           | [CR2, HLA-DRB5, CR1, ITGA4, CD3G, GP1BA, CD1C, CD3E, CD3D, CD2, FCER2, CD8B, CD5, CD8A, IL1B, CD19, CD7, CD38, IL7R, MS4A1, CD22]                                                                                                                            |
|                                   | Autoimmune thyroid disease                             | 10       | 5.32E-09    | 4.70E-07          | 12.6                                                                                                           | [HLA-DRB5, PRF1, GZMB, CTLA4, FASLG, HLA-DOA, HLA-DQA2, HLA-G, HLA-DOB, HLA-DQA1]                                                                                                                                                                            |
|                                   | Type I diabetes mellitus                               | 11       | 3.27E-11    | 3.52E-09          | 16.8                                                                                                           | [HLA-DRB5, IFNG, IL1B, PRF1, GZMB, FASLG, HLA-DOA, HLA-DQA2, HLA-G, HLA-DOB, HLA-DQA1]                                                                                                                                                                       |
|                                   | Chemokine signaling pathway                            | 22       | 1.59E-13    | 3.08E-11          | 7.63                                                                                                           | [CCL14, ITK, CXCL9, CCL22, CCL21, NCF1, PRKCB, CXCR5, CXCR6, CXCL13, PIK3CG, CXCL10, CXCL11, CCL8, CCL5, CXCR3, XCL2, CCR7, CCL19, CCL18, CCR5, CCR2]                                                                                                        |
|                                   | Cytokine-cytokine receptor interaction                 | 35       | 6.30E-23    | 6.11E-20          | 8.79                                                                                                           | [CCL14, CXCL9, TNFRSF13B, CXCR5, FASLG, TNFRSF11B, CXCR6, IL2RG, CXCL13, TNFRSF13B, CCL8, CCL5, CXCR3, IL21R, TNFRSF17, TNFSF11, CCR7, CCL19, CCL18, CCR5, IL12RB1, CCR2, CCL22, CCL21, CD70, TNFRSF9, IFNLR1, CXCL10, CXCL11, IFNG, IL1B, XCL2, CD27, IL7R] |
|                                   | Asthma                                                 | 5        | 8.35E-05    | 0.0045            | 10.9                                                                                                           | [HLA-DRB5, HLA-DOA, HLA-DQA2, HLA-DOB, HLA-DQA1]                                                                                                                                                                                                             |
|                                   | Toll-like receptor signaling pathway                   | 8        | 1.59E-04    | 0.00771           | 5.19                                                                                                           | [CXCL10, CXCL11, CXCL9, CCL5, IL1B, TLR8, LBP, PIK3CG]                                                                                                                                                                                                       |
|                                   | Systemic lupus erythematosus                           | 8        | 0.00117     | 0.0442            | 3.85                                                                                                           | [C3, HLA-DRB5, IFNG, C7, HLA-DOA, HLA-DQA2, HLA-DOB, HLA-DQA1]                                                                                                                                                                                               |
|                                   | Cell adhesion molecules (CAMs)                         | 22       | 7.20E-17    | 1.74E-14          | 10.9                                                                                                           | [CADM3, HLA-DRB5, ITGA4, ITGAL, SELE, HLA-G, CD2, SELP, SPN, PTPRC, CD6, CD8B, SELL, CD6A, CTLA4, PDCD1, HLA-DOA, ICOS, HLA-DQA2, HLA-DOB, HLA-DQA1, CD22]                                                                                                   |
|                                   | Antigen processing and presentation                    | 12       | 9.42E-09    | 7.62E-07          | 8.94                                                                                                           | [CITA, HLA-DRB5, CD8B, KLRG2, CD8A, KLRD1, HLA-DOA, HLA-DQA2, HLA-G, HLA-DOB, HLA-DQA1, KIR2DL4]                                                                                                                                                             |
| T cell receptor signaling pathway | 17                                                     | 6.73E-13 | 9.53E-11    | 10.3              | [ITK, CD3G, CD3E, CD3D, PIK3CG, ZAP70, PTPRC, CD8B, IFNG, CD8A, LCK, CTLA4, PRKCG, CD247, PDCD1, ICOS, CARD11] |                                                                                                                                                                                                                                                              |
| 5                                 | Arrhythmogenic right ventricular cardiomyopathy (ARVC) | 9        | 4.28E-05    | 0.00259           | 5.38                                                                                                           | [DES, CDH2, ACTN2, CACNA2D1, ITGA10, PKP2, ITGA8, ITGB8, CACNG4]                                                                                                                                                                                             |
|                                   | Neuroactive ligand-receptor interaction                | 16       | 2.54E-04    | 0.0117            | 2.77                                                                                                           | [GABRA2, GRIA1, CHRM3, GRIA2, THRB, LPAR1, NPY1R, ADRB1, GRIK2, PRLR, MCHR1, GHR, GABRR1, GLRB, F2RL2, NTSR1]                                                                                                                                                |
|                                   | ECM-receptor interaction                               | 9        | 1.17E-04    | 0.00596           | 4.74                                                                                                           | [COMP, RELN, COL11A1, ITGA10, TNC, ITGA8, ITGB8, THBS2, THBS4]                                                                                                                                                                                               |
|                                   | Dilated cardiomyopathy                                 | 10       | 3.59E-05    | 0.00232           | 4.92                                                                                                           | [PLN, DES, CACNA2D1, ITGA10, ITGA8, ITGB8, ADRB1, ADCY8, CACNG4, ADCY5]                                                                                                                                                                                      |
|                                   | Cell adhesion molecules (CAMs)                         | 15       | 3.14E-07    | 2.34E-05          | 5.03                                                                                                           | [NLGN4X, NEGR1, NRXN1, NRXN3, NRXN2, CLDN11, NFASC, CDH2, CNTN1, ITGA8, ITGB8, NRCAM, NCAM1, NCAM2, NECTIN3]                                                                                                                                                 |
|                                   | TGF-beta signaling pathway                             | 8        | 7.28E-04    | 0.0307            | 4.12                                                                                                           | [COMP, BMP2, FST, BMP8B, INHBA, THBS2, BMP7, THBS4]                                                                                                                                                                                                          |

**Table S3: Enrichment analysis for KEGG pathways performed using PROMO on the five gene clusters. Top significant KEGG pathways are displayed for each gene cluster. Enrichments were calculated using TANGO<sup>4</sup>.**

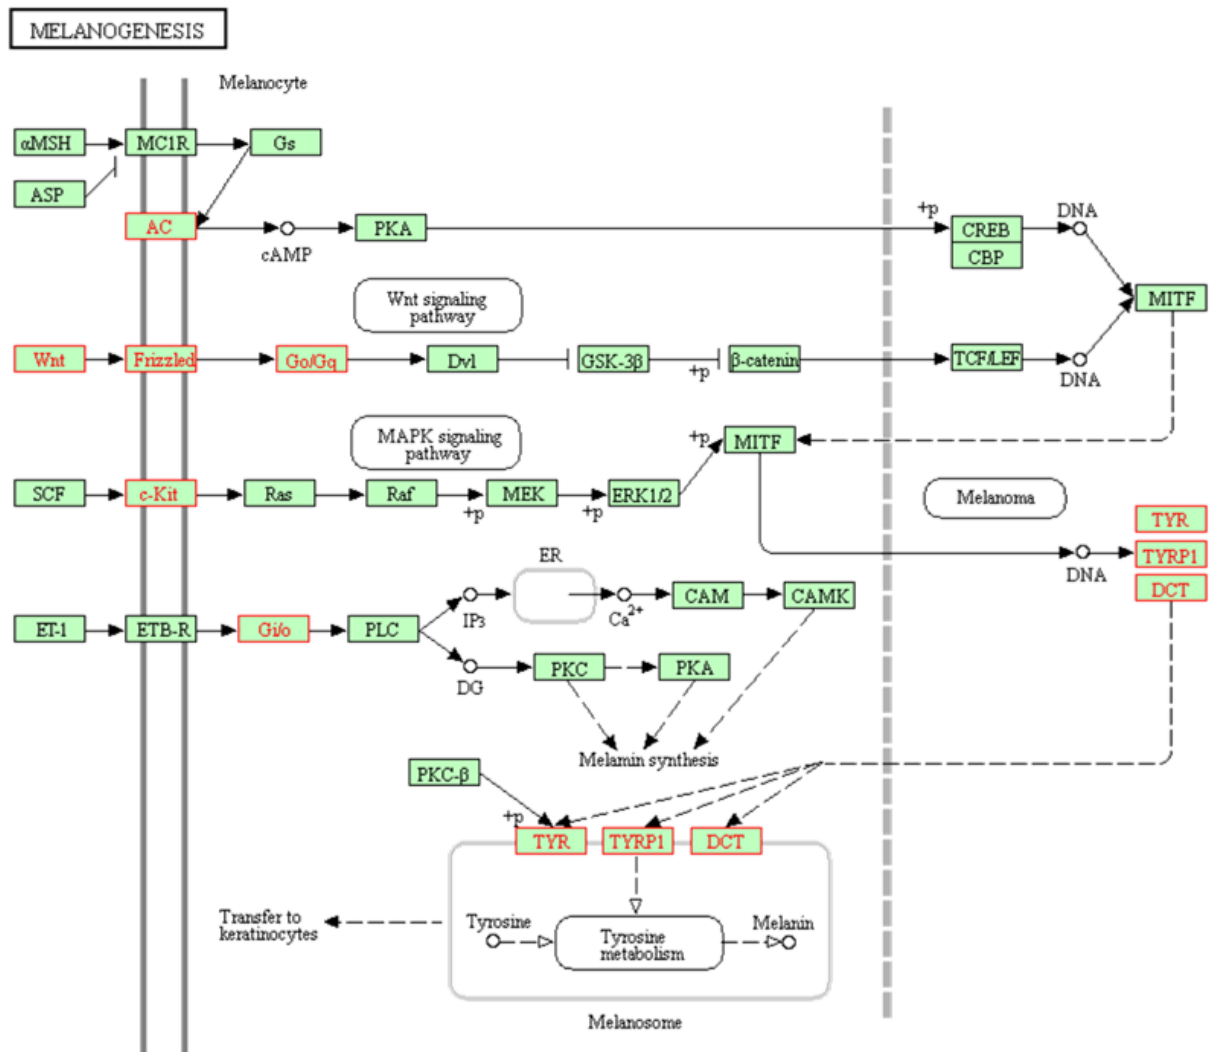

**Figure S4: Sample-cluster 4 (the 'Melanogenesis-high' cluster) overexpressed genes in the KEGG "Melanogenesis" pathway.** The 384 genes composing cluster 1 (Fig. 1a) are overexpressed in the 'Melanogenesis-high' sample cluster and were found to be enriched ( $p < 0.005$ ) for the Melanogenesis KEGG pathway. The nine Melanogenesis pathway genes (TYR, WNT4, KIT, DCT, FZD9, GNAO1, ADCY1, ADCY2, TYRP1) are marked in red. The analysis was performed using the Expander<sup>3,4</sup> tool. Pathway and graphics were taken from the Kyoto Encyclopedia of Genes and Genomes (KEGG<sup>5</sup>) database.

| Id | Gene Symbol | p-value  | FC   | Id  | Gene Symbol  | p-value  | FC   |
|----|-------------|----------|------|-----|--------------|----------|------|
| 1  | OCA2        | 7.79E-11 | 5.72 | 51  | DUSP9        | 1.31E-09 | 1.70 |
| 2  | TYRP1       | 7.12E-08 | 5.62 | 52  | WNK2         | 5.49E-06 | 1.67 |
| 3  | ITGB1BP3    | 9.04E-13 | 3.29 | 53  | CDK2         | 1.56E-14 | 1.66 |
| 4  | SLC7A4      | 1.07E-06 | 3.03 | 54  | SEPT3        | 5.12E-11 | 1.66 |
| 5  | IP6K3       | 9.92E-06 | 2.94 | 55  | LAMA1        | 6.79E-06 | 1.66 |
| 6  | C14orf34    | 4.50E-08 | 2.78 | 56  | KCNAB2       | 3.08E-13 | 1.62 |
| 7  | GABRA5      | 5.46E-10 | 2.67 | 57  | MGC16025     | 6.77E-13 | 1.62 |
| 8  | KRTAP19-1   | 8.80E-12 | 2.66 | 58  | PRR5-ARHGAP8 | 5.81E-05 | 1.61 |
| 9  | FAM69C      | 4.69E-16 | 2.64 | 59  | SNCB         | 6.44E-06 | 1.60 |
| 10 | ABCB5       | 7.16E-12 | 2.64 | 60  | GNAO1        | 1.08E-07 | 1.58 |
| 11 | KIT         | 3.97E-07 | 2.43 | 61  | LOC148145    | 1.92E-05 | 1.57 |
| 12 | VEGF        | 2.12E-05 | 2.41 | 62  | MAST1        | 4.67E-07 | 1.56 |
| 13 | SLC6A17     | 4.06E-12 | 2.29 | 63  | HRK          | 2.00E-07 | 1.56 |
| 14 | MGAT5B      | 5.10E-14 | 2.29 | 64  | PLAC2        | 3.70E-05 | 1.54 |
| 15 | GNAL        | 2.21E-09 | 2.22 | 65  | C6orf176     | 6.07E-09 | 1.52 |
| 16 | ACCSL       | 7.46E-11 | 2.22 | 66  | SFTPC        | 1.36E-07 | 1.50 |
| 17 | ABCC2       | 5.53E-09 | 2.18 | 67  | RIMS4        | 3.04E-06 | 1.49 |
| 18 | ONECUT1     | 2.98E-09 | 2.16 | 68  | ONECUT2      | 2.86E-05 | 1.48 |
| 19 | NECAB2      | 7.78E-09 | 2.16 | 69  | FZD9         | 5.88E-09 | 1.48 |
| 20 | CNTFR       | 2.62E-05 | 2.13 | 70  | ARHGAP8      | 3.11E-05 | 1.47 |
| 21 | PRODH       | 1.47E-07 | 2.09 | 71  | LOC100127888 | 2.29E-09 | 1.47 |
| 22 | TRPM1       | 5.16E-12 | 2.07 | 72  | TRIM63       | 4.41E-16 | 1.46 |
| 23 | PNMA6A      | 1.03E-16 | 2.06 | 73  | DGCR5        | 7.95E-06 | 1.45 |
| 24 | POU4F1      | 2.54E-07 | 2.02 | 74  | EPHA5        | 1.94E-07 | 1.45 |
| 25 | SLC5A10     | 9.72E-07 | 1.97 | 75  | TMEM151A     | 1.11E-05 | 1.42 |
| 26 | SILV        | 1.57E-15 | 1.97 | 76  | NRTN         | 1.72E-05 | 1.40 |
| 27 | FOXF2       | 2.70E-09 | 1.95 | 77  | GBX2         | 7.23E-05 | 1.40 |
| 28 | SLC16A6     | 4.45E-05 | 1.91 | 78  | C1QL4        | 2.60E-08 | 1.40 |
| 29 | CDK15       | 2.27E-07 | 1.91 | 79  | FSTL4        | 1.70E-06 | 1.40 |
| 30 | L1CAM       | 1.84E-06 | 1.89 | 80  | CPNE7        | 2.24E-06 | 1.39 |
| 31 | CDH3        | 1.03E-10 | 1.88 | 81  | DUSP8        | 1.86E-08 | 1.39 |
| 32 | DPYSL4      | 1.42E-10 | 1.87 | 82  | TFAP2A       | 8.93E-22 | 1.38 |
| 33 | KIF1A       | 5.17E-06 | 1.87 | 83  | C6orf218     | 4.23E-12 | 1.35 |
| 34 | NKX2-8      | 6.01E-05 | 1.87 | 84  | ZNF703       | 4.07E-14 | 1.34 |
| 35 | BRSK2       | 2.79E-09 | 1.86 | 85  | HES6         | 5.65E-08 | 1.33 |
| 36 | PITX2       | 6.27E-05 | 1.85 | 86  | C15orf59     | 7.46E-05 | 1.31 |
| 37 | PRRT4       | 7.56E-07 | 1.85 | 87  | LGI3         | 1.28E-05 | 1.30 |
| 38 | ADAM11      | 2.01E-11 | 1.82 | 88  | NCRNA00052   | 2.77E-07 | 1.30 |
| 39 | MCF2L       | 5.82E-09 | 1.82 | 89  | TPCN2        | 1.73E-10 | 1.28 |
| 40 | RTN4R       | 1.03E-14 | 1.81 | 90  | LOC390595    | 9.71E-06 | 1.27 |
| 41 | CA14        | 3.96E-14 | 1.80 | 91  | ADAMTSL5     | 1.22E-07 | 1.27 |
| 42 | NR4A3       | 8.93E-10 | 1.80 | 92  | DCT          | 6.46E-05 | 1.27 |
| 43 | TSPAN10     | 1.03E-11 | 1.78 | 93  | GPRC5A       | 6.85E-05 | 1.26 |
| 44 | TPPP        | 1.09E-11 | 1.77 | 94  | BAIAP2L1     | 1.57E-09 | 1.26 |
| 45 | GMPR        | 1.43E-12 | 1.77 | 95  | ANKRD9       | 7.20E-13 | 1.25 |
| 46 | KCNH1       | 1.07E-06 | 1.76 | 96  | ITPKB        | 6.43E-11 | 1.25 |
| 47 | DLL3        | 1.41E-09 | 1.74 | 97  | TTYH2        | 1.51E-13 | 1.25 |
| 48 | KREMEN2     | 2.50E-08 | 1.74 | 98  | CELF5        | 2.06E-05 | 1.25 |
| 49 | SEMA6A      | 5.63E-20 | 1.72 | 99  | MANEAL       | 4.53E-07 | 1.25 |
| 50 | SULT4A1     | 5.47E-05 | 1.72 | 100 | LRRC39       | 7.89E-07 | 1.24 |

**Table S4: List of the 100 most over-expressed genes distinguishing cluster 4 samples from all other clusters. Genes are sorted by descending mean fold-change(FC). P-value was calculated using the rank-sum test**

applied on [Melanogenesis-high] samples (n=118) vs. [Immune,Keratin,Melanogenesis-low] samples (n=351). p-value cutoff:  $p < 0.0001$ . Genes belonging to the 'Melanin biosynthesis' GO term were identified using the GORILLA<sup>12</sup> tool and are marked in bold. Complete lists of overexpressed genes, in addition to overexpressed genes in the other sample clusters, appear on Additional File 2.

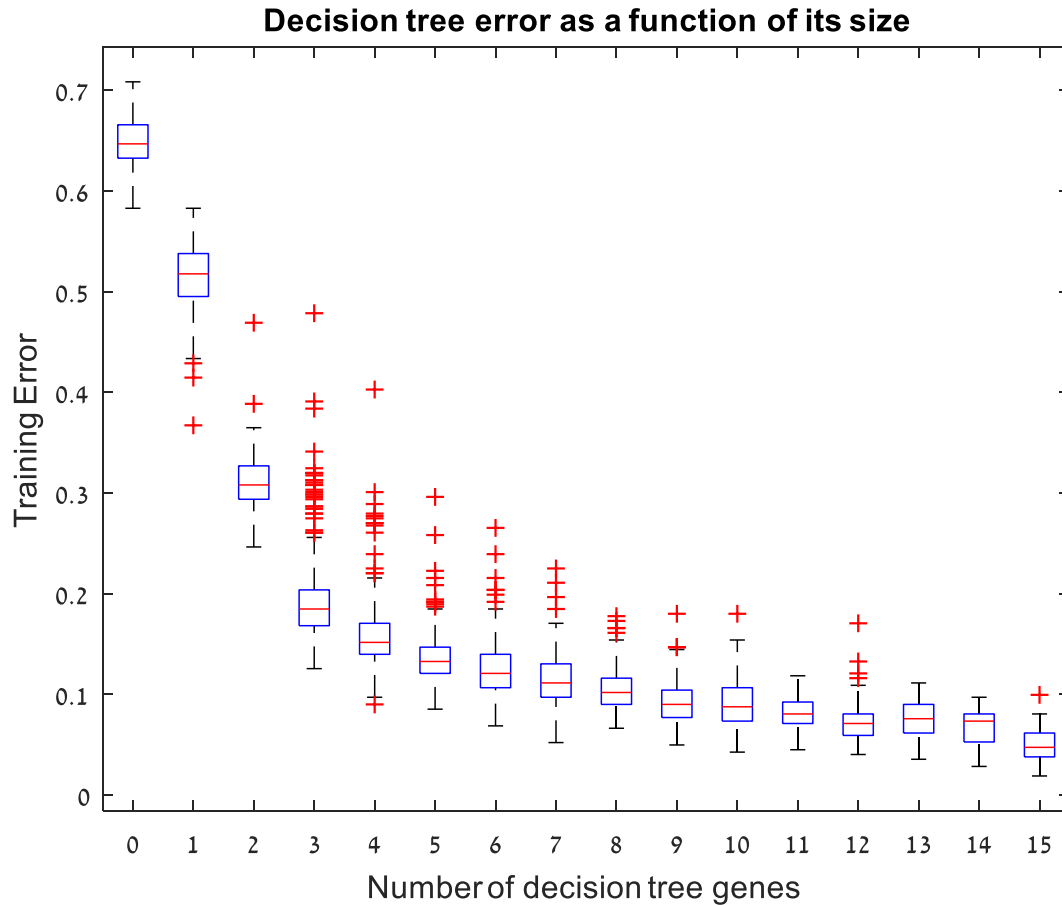

**Figure S5: Error of decision tree classifiers as a function of the number of predictor genes.** For a varying number of genes (1-15) and for varying pruning levels (0-10), 30 decision trees were trained on resampled subsets of the dataset samples (resampling ratio of 0.9). The graph shows the average training error for each decision tree size. A three-gene classifier for predicting melanoma's molecular subtype gives a good balance between simplicity (avoiding over-fitting) and performance and reaches a training error that is reasonably close to that obtained by a larger number of genes.

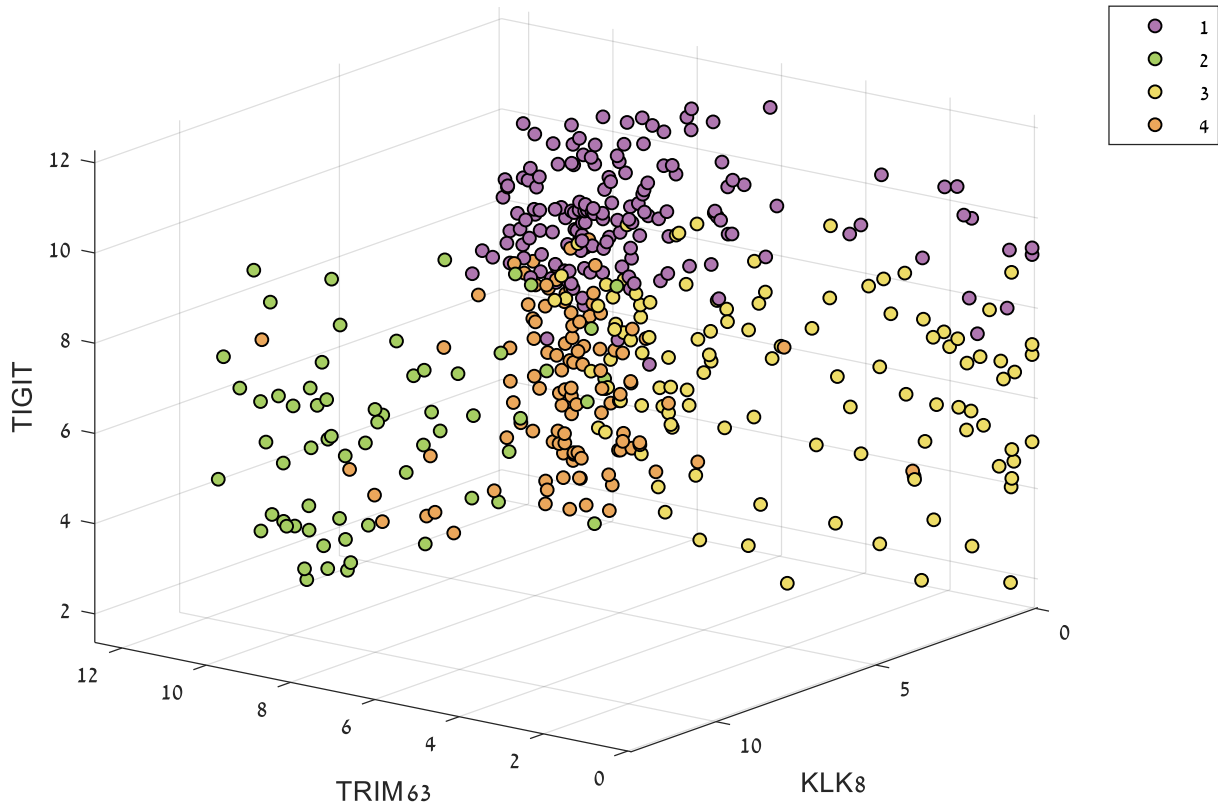

**Figure S6: Dispersion of the 469 melanoma samples projected to the 3-dimensional space of the three selected classifier predictors: KLK8, TIGIT, and TRIM63.** Samples are colored by the melanoma subgroups. The axis representing the expression level of the KLK gene distinguishes cluster 2 samples (green circles, “Keratin” subgroup) showing high levels of KLK8 expression, from all other clusters. The axis representing the expression of the TIGIT gene distinguishes cluster 1 samples (purple circles, “Immune” subgroup) showing high levels of TIGIT expression, from the other subgroups. Lastly, the axis representing the expression of the TRIM63 gene distinguished cluster 3 samples (yellow circles, “Melanogenesis-low” subtype) from cluster 4 samples (orange circles, “Melanogenesis-high” subtype).

**KLK8** (<https://www.proteinatlas.org/ENSG00000129455-KLK8/tissue>)

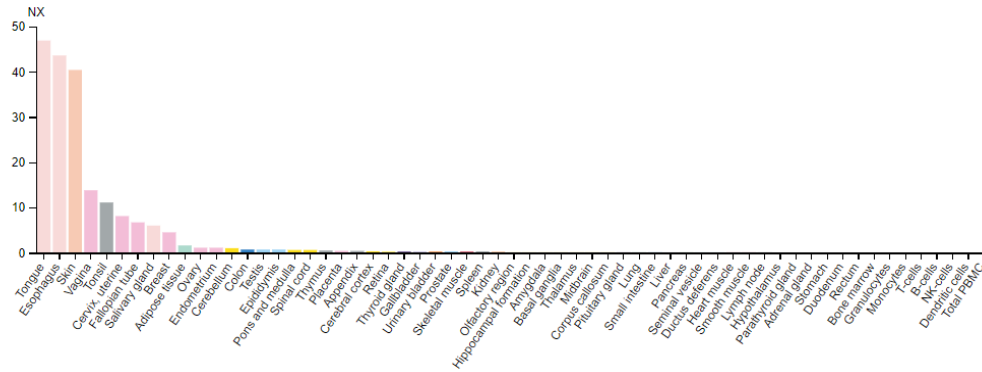

**TIGIT** (<https://www.proteinatlas.org/ENSG00000181847-TIGIT/tissue>)

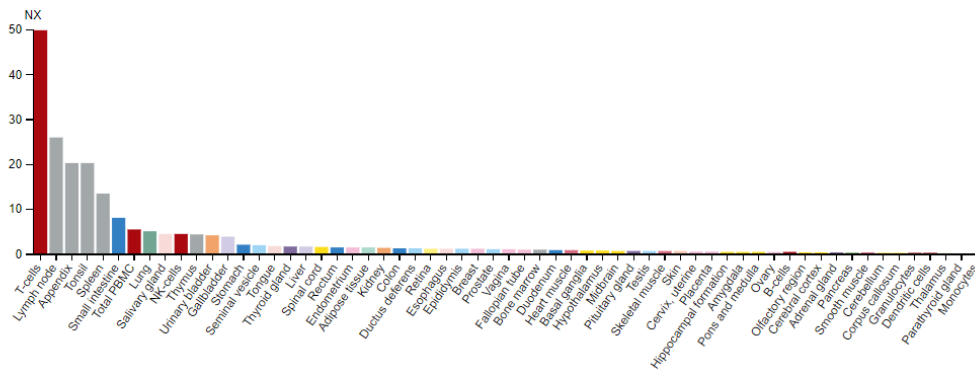

**TRIM63** (<https://www.proteinatlas.org/ENSG00000158022-TRIM63/tissue>)

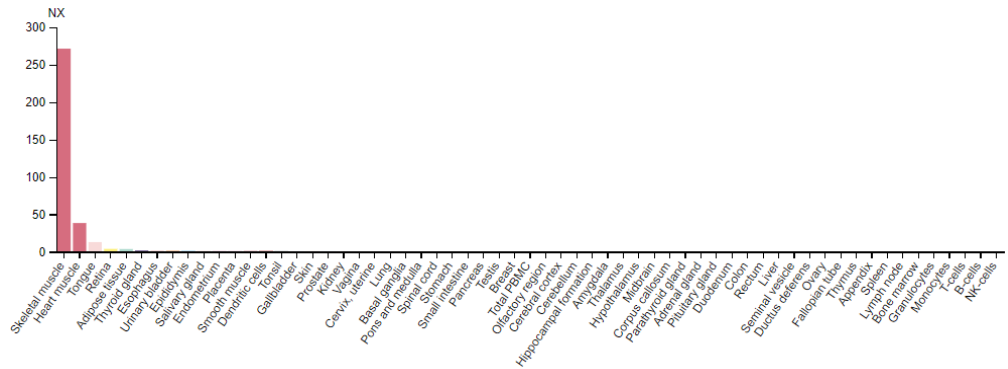

**Figure S7: The RNA expression levels on normal tissues of the three classifier predictors: KLK8, TIGIT, and TRIM63.** Consensus Normalized eXpression (NX) levels for 55 tissue types and six blood cell types, created by The Human Protein Atlas<sup>6,7</sup> by combining the data from three transcriptomics datasets (HPA<sup>6</sup>, GTEx<sup>8</sup> and FANTOM<sup>5,9,10,11</sup>). KLK8 is primarily expressed in tongue, esophagus and skin tissues. TIGIT is primarily expressed in blood (T-cells) and lymphoid tissues. TRIM63 is primarily expressed in skeletal muscle tissue. Source: Human Protein Atlas available from <http://www.proteinatlas.org>.

## Supplementary Information - Section 2

### Analysis of the topology and predictor biological function of decision trees for subsampled datasets

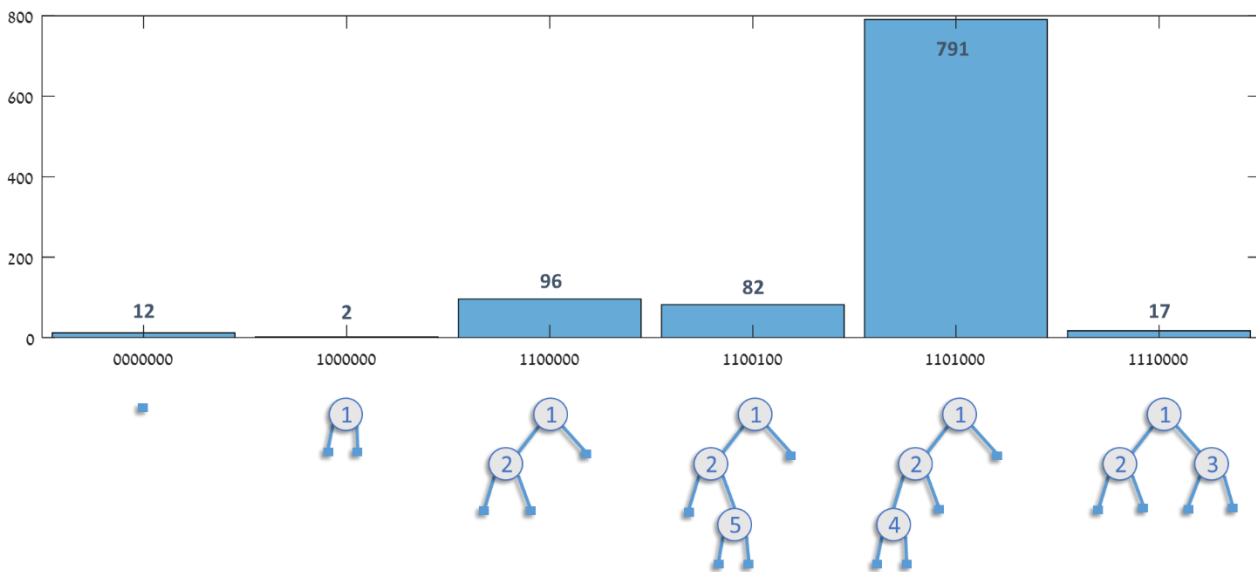

**Figure S8: Distribution of the topology of 1000 decision trees.** For analyzing the topology and biological function of the tree predictors, we trained 1000 3-gene decision trees by resampling the dataset samples (resample factor = 0.8). The most frequent topology was '1101000', identical to the topology of the final decision tree presented in Fig. 4, which was trained on the entire dataset (Note that 1101000 and 1100100 are considered different since the left child of every node always corresponds to the "less than" subgroup.)

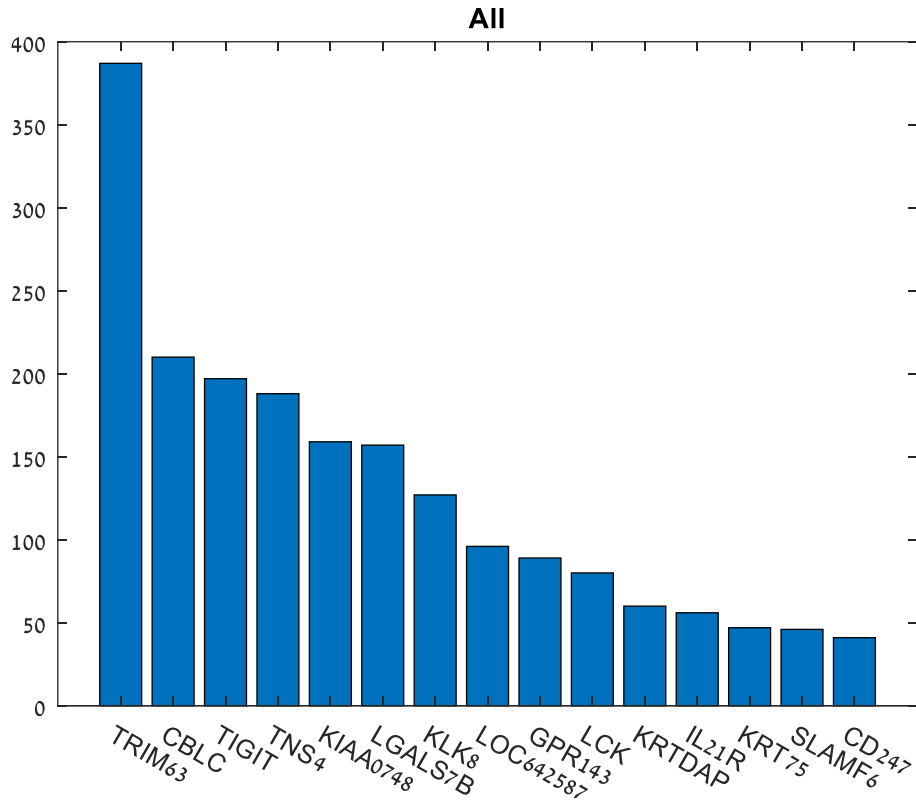

**Figure S9: Most frequent genes in the 1000 decision trees (in all tree positions).**



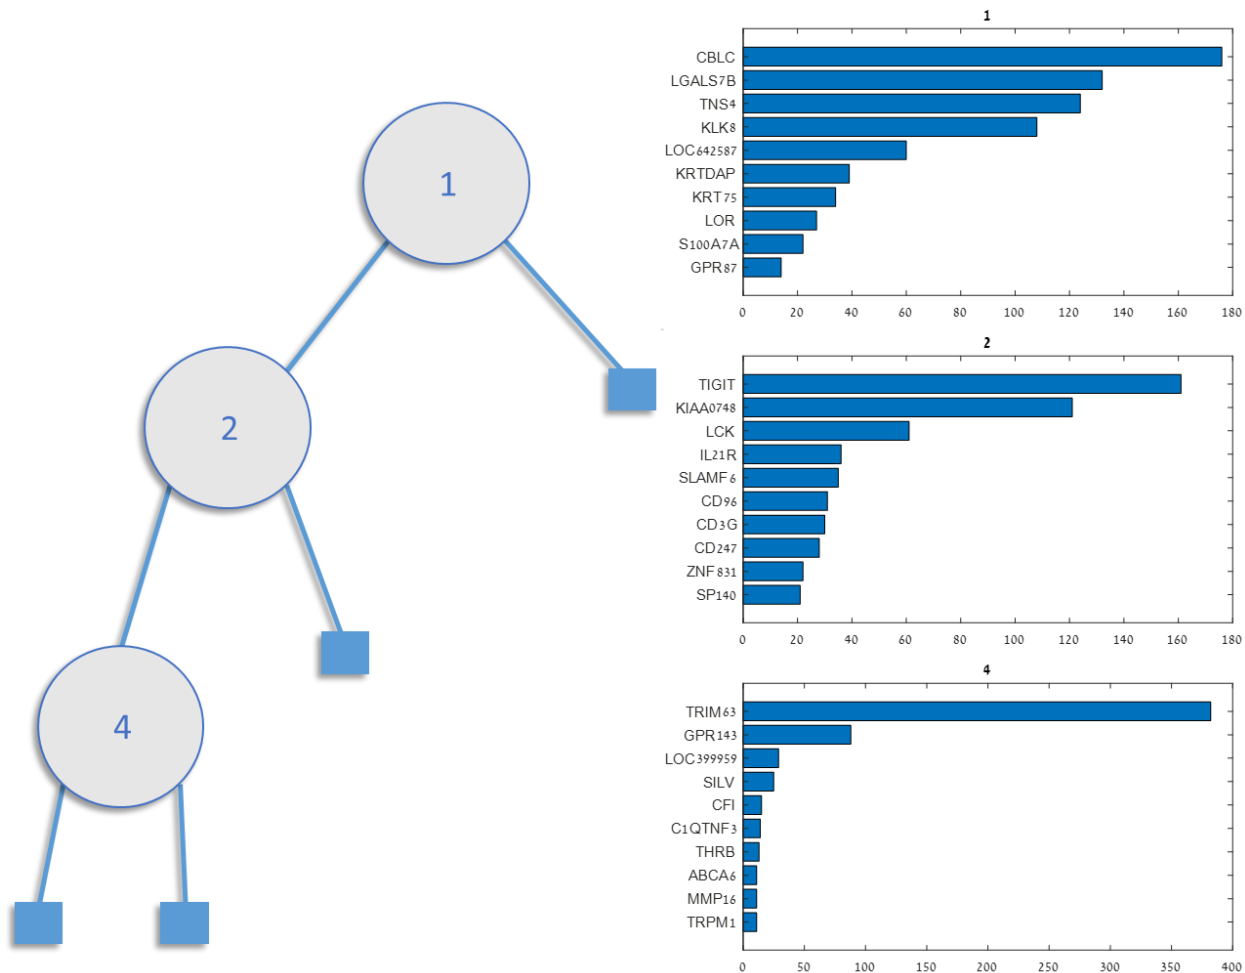

**Figure S10: Most frequent predictor genes for each position in the tree and their biological function.** For each position in the 1101000 topology, we generated a list of the 10 most frequent predictor genes as appearing on the 791 random tree variants. The analysis showed that the most frequent genes in each position are characterized by a specific biological function. Position 1, which forms the tree's root, was typically assigned with keratin and other skin related biomarkers, such as LGALS7B, TNS4 and KLK8. Position 2 was typically assigned with well known immune markers such as TIGIT, KIAA0748, LCK, and IL21R. Position 4 was preferentially assigned with TRIM63, but also with typical melanogenesis genes such as GPR143, SILV, and TRPM1. Interestingly, the lists also included genes that are less familiar in their context here, such as LOC399959.

The results demonstrate the hierarchy of the biological functions by which melanoma samples can be partitioned into distinct subgroups, and also show that the final tree presented in Fig. 4 is a representative of a stable tree topology and is using predictor genes that are biomarkers of the above three biological functions.

## Supplementary Information - Section 3

### Experimental validation of the predictor genes

| Patient number in Figure | Age at time of primary tumor diagnosis | Survival from T diagnosis (months) | Survival from regional lymph node (N) diagnosis (months) | Survival from distant metastasis (M) diagnosis (months) | Current status |
|--------------------------|----------------------------------------|------------------------------------|----------------------------------------------------------|---------------------------------------------------------|----------------|
| 1                        | 81                                     | over 60 months                     |                                                          |                                                         | Alive          |
| 2                        | 67                                     | over 60 months                     |                                                          |                                                         | Alive          |
| 3                        | 66                                     | over 60 months                     |                                                          |                                                         | Alive          |
| 4                        | 88                                     | 24                                 | 4.15                                                     |                                                         | Deceased       |
| 5                        | 74                                     | 19.75                              | 6.77                                                     |                                                         | Deceased       |
| 6                        | 67                                     | 19.48                              | 17.38                                                    | 0.85                                                    | Deceased       |

**Table S5: Clinical details for the six patients selected for Immunohistochemical staining.** Patients 1-3 survived for more than 60 months after diagnosis and were therefore labeled as "Good Survival", whereas patients 4-6 survived for less than 24 months and were therefore labeled as "Poor Survival".

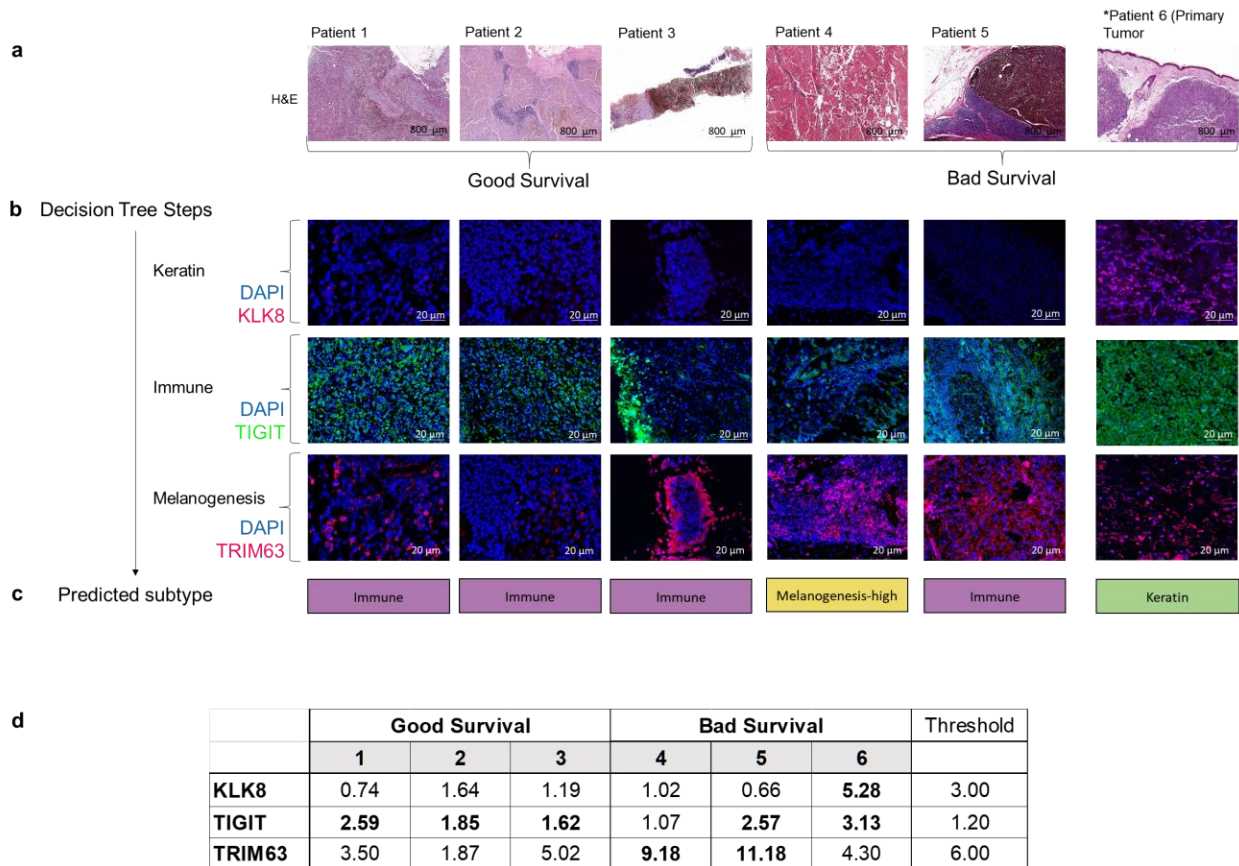

**Figure S11: Keratin, Melanogenesis and immune characteristics of six additional samples. (a)** Hematoxylin and Eosin (H&E) staining of five lymph node samples containing melanoma metastases (patients 1-5) and one primary melanoma (patient 6) from six different patients imaged at 20x magnification. Patients clinical details appear on Table S1.6. **(b)** Immunohistochemical staining of the three proteins of the decision tree on the samples of the six patients. Nuclei were stained blue using DAPI. Row 1: Using KLK8 (pink) as a predictor for the Keratin subgroup. Row 2: Using TIGIT (green) as a predictor of the Immune subgroup. Row 3: Using TRIM63 (red) as a predictor of the Melanogenesis-high subgroup. **(c)** The assignment of the specimens from the six patients to subtypes based on the expression levels of the three predictor genes are shown at the bottom bar (see more details on the next paragraph). **(d)** A matrix quantifying the fluorescence intensity of immunohistochemistry across biomarkers and patients. For each protein, an expression threshold was manually defined and over expressed values were marked in bold.

Each sample was assigned to a melanoma subgroup based on the decision tree's logic: The KLK8 expression levels distinguished sample 6, the only primary sample, from all other samples, and assigned it to the Keratin subgroup. The high expression levels of the immune marker TIGIT on samples 1-3 and 5 assigned them to the Immune subgroup. Finally, the high levels of the Melanogenesis marker TRIM63 assigned sample 4 to the Melanogenesis-high subgroup. The prediction procedure correctly identified sample 6 to keratin, and samples 1-4 to melanoma subgroups that are in agreement with their evaluated survival category. However, sample 5 was assigned to the Immune subgroup, which does not match its evaluated survival category.

| Patient number on Figure | Age at time of primary tumor diagnosis | Survival from T diagnosis (months) | Survival from regional lymph node (N) diagnosis (months) | Survival from distant metastasis (M) diagnosis (months) | Current status | Category determined by expert evaluation of the patient |
|--------------------------|----------------------------------------|------------------------------------|----------------------------------------------------------|---------------------------------------------------------|----------------|---------------------------------------------------------|
| 1                        | 78                                     | 45                                 | 24                                                       | 6                                                       | Deceased       | Good                                                    |
| 2                        | 43                                     | 47                                 | 49                                                       |                                                         | Alive          | Good                                                    |
| 3                        | 68                                     | 26                                 | 26                                                       |                                                         | Alive          | Good                                                    |
| 4                        | 90                                     | 16.4                               | 3.85                                                     |                                                         | Deceased       | Bad                                                     |
| 5                        | 66                                     | 34                                 | 21                                                       |                                                         | Deceased       | Bad                                                     |
| 6                        | 90                                     | 27.7                               | 22.44                                                    | 24.51                                                   | Deceased       | Bad                                                     |

**Table S6: Clinical details for the second batch of patients selected for Immunohistochemical staining.** Unlike the first batch, the survival times were not sufficiently distinctive and therefore the categorization of the patients into good and bad survival was done by the expert physician.

## **Supplementary Information - Section 4**

### **Comparison of the identified melanoma subgroups to the Lund subtypes**

In 2010, Jönsson et al. identified four expression-based subgroups (a.k.a the Lund subgroups) by analyzing 57 stage IV melanomas taken from patients<sup>13</sup>. The subtypes were later confirmed on additional patient cohorts<sup>14,15,16</sup>. Here, we compare our melanoma subgroups to the Lund subtypes on the TCGA dataset, using labels obtained from the authors of<sup>16</sup>. The comparison showed that the two classifications are overall similar (Chi-square  $p < 3.0e-67$ , see Fig. S12). Two of our subgroups, Keratin and Melanogenesis-low, showed higher similarity to the Lund subtypes Normal and Proliferative, respectively. However, the Immune and Melanogenesis-high subgroups showed lower similarity to the Lund corresponding subgroups (High immune and Pigmentation, respectively). Furthermore, our classification stratified the metastatic patients better into prognostic subgroups in terms of five-year survival (Fig. S15).

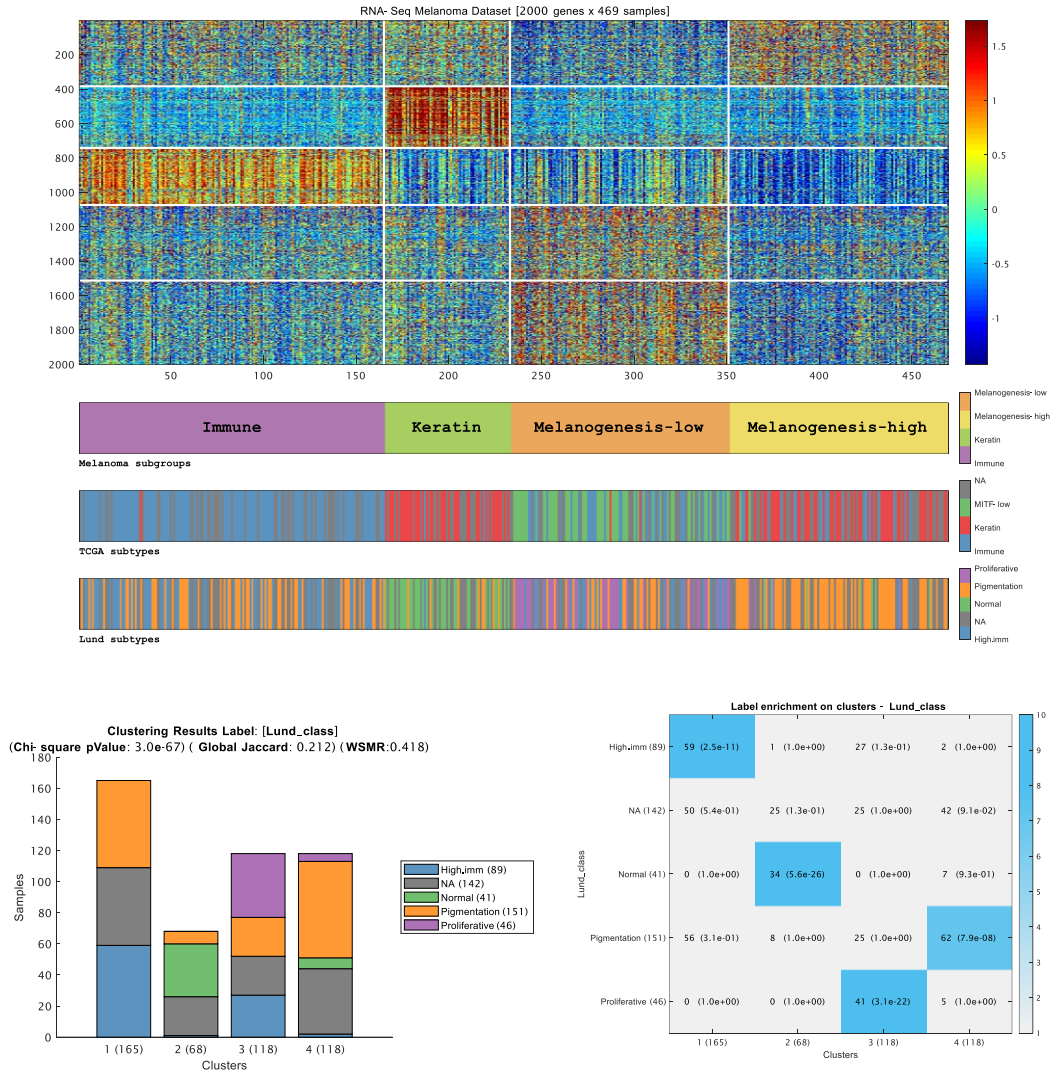

Figure S12: Comparison of the melanoma subgroups with the Lund subtypes using all dataset samples (n=469).

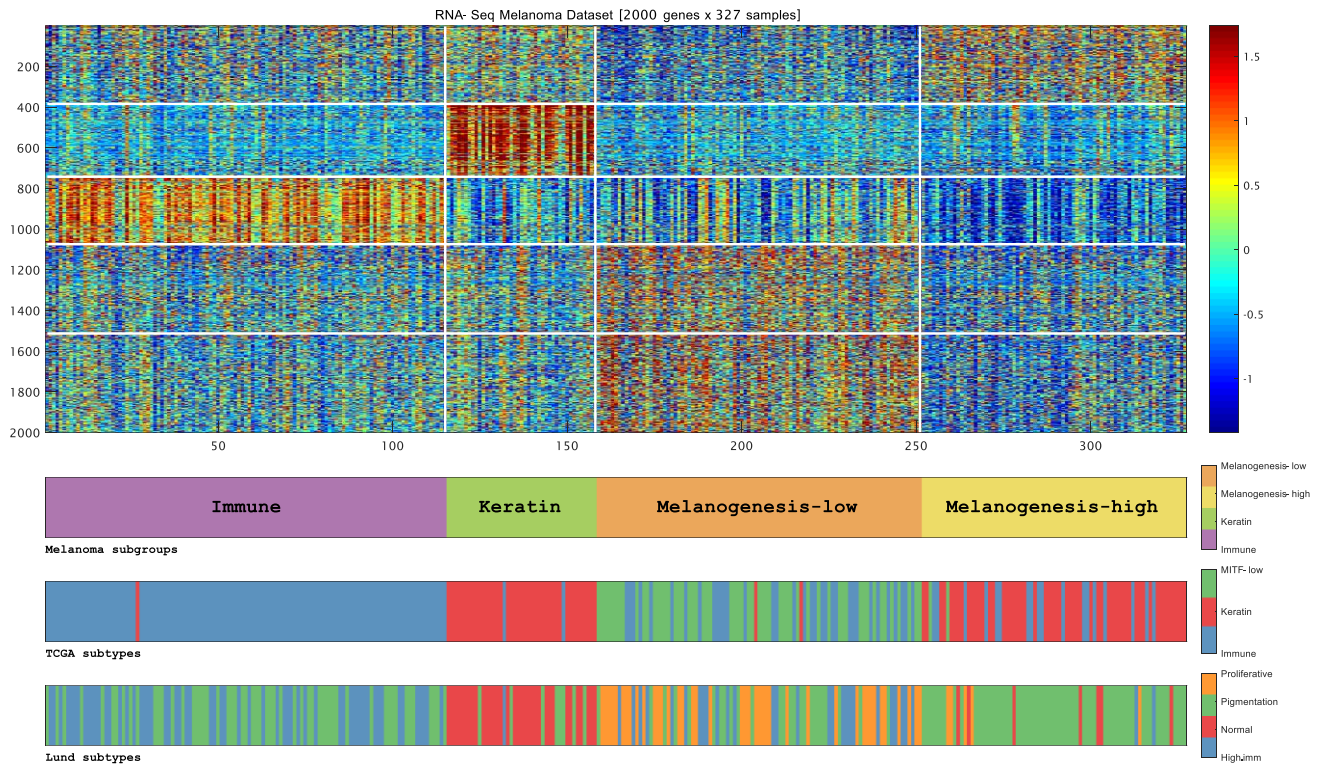

**Figure S13: Comparison of the melanoma subgroups with the Lund subtypes, omitting samples for which Lund subtype is not available (n=327).**

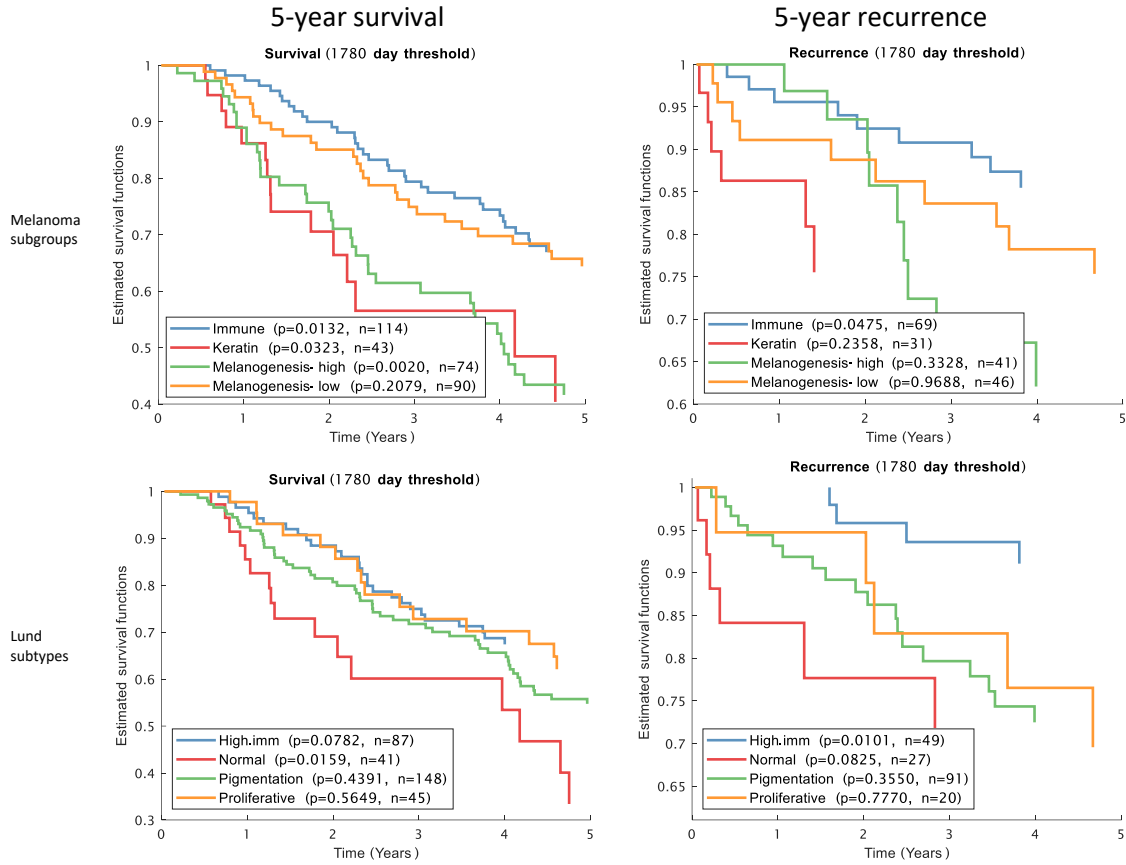

**Figure S14: Comparison of five-year survival and recurrence between the melanoma subgroups identified in this study and the Lund subgroups.** Only samples for which Lund subtype is available were included in the analysis ( $n=327$ ).



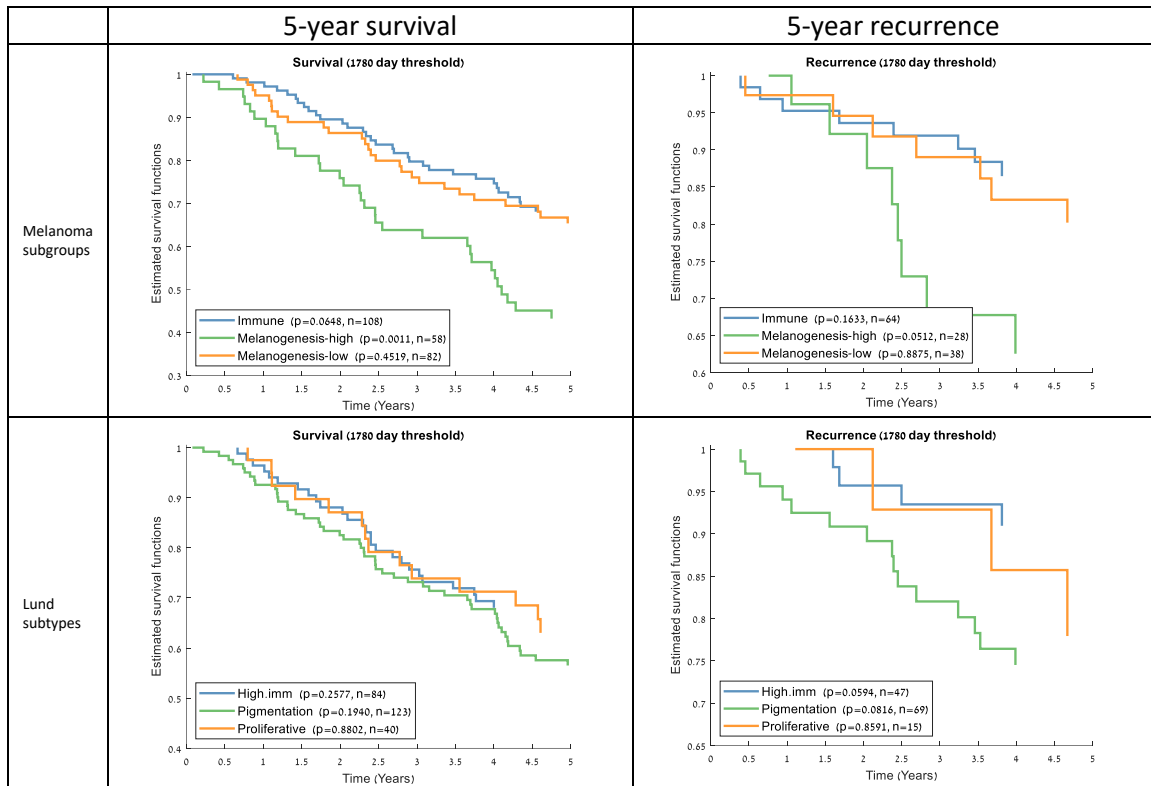

**Figure S15: Five-year survival and recurrence plots for metastasis samples using the melanoma subgroups identified in this study and the Lund subgroups.** Only metastasis samples for which Lund subtype and followup information are available were included in the analysis. Analysis was performed after removing 104 non-metastasis samples and 100 samples for which Lund subgroup was not available. Of the remaining 260 samples, 260 had survival data, and 135 had recurrence data available. A small group with < 15 samples representing the non-metastatic (Normal or Keratin) subtype was excluded from each analysis, (n=12 for our classification and n=13 for Lund in the survival analysis and n=5 for our classification and n=4 for Lund in the recurrence analysis).

## Supplementary Information - Section 5

### Validation of the tree on the dataset of Cirenajwis et al., 2015

To validate the three-gene decision tree described in Fig. 4, we downloaded the Lund dataset by Cirenajwis et al.<sup>15</sup> from GEO<sup>17</sup> (GSE65904). The dataset contains expression profiles of 214 stage III melanoma samples, measured by Illumina Human-HT12v4.0 BeadChip arrays. We applied a log<sub>2</sub> transformation to the data, and mapped each of the three predictor genes to a corresponding probeset ID in the Lund dataset: A single probeset was available for the TRIM63 gene (ILMN\_1702489), where two probesets were available for both TIGIT and KLK8, of which we manually selected one (ILMN\_2125017 and ILMN\_1735700 respectively).

Before applying the decision tree on the samples, we manually calibrated the tree threshold values. This step was required because the new dataset was generated using a different platform (microarrays) and therefore had different expression value distributions for the three genes compared with the TCGA dataset (RNA-Seq), on which the decision tree was trained. Furthermore, the distributions differed also due to the different characteristics of the samples here compared to TCGA samples, where samples identified as primary had relatively large tumors and thus were likely more advanced<sup>2</sup>.

When executed, the decision tree assigned a subgroup label to each one of the melanoma samples (See Table S7). Samples showing high expression of KLK8 (above 7.44) were assigned to the Keratin subgroup (n=13). Out of the remaining samples, those with high expression of TIGIT (above 7.36) were assigned to the Immune subgroup (n=80). Out of the remaining samples, those with high expression of TRIM63 (above 9.45) were assigned to the Melanogenesis-high subgroup (n=41), and lastly, all remaining samples were assigned to the Melanogenesis-low subgroup (See Fig. S16). Remarkably, the Immune, Melanogenesis-low, and Melanogenesis-high subgroups showed distinct survival curves with relative risk that is in agreement with their relative risk on the TCGA dataset. These results demonstrate the ability of the decision tree to identify prognostic subgroups of melanoma (Fig. S17).

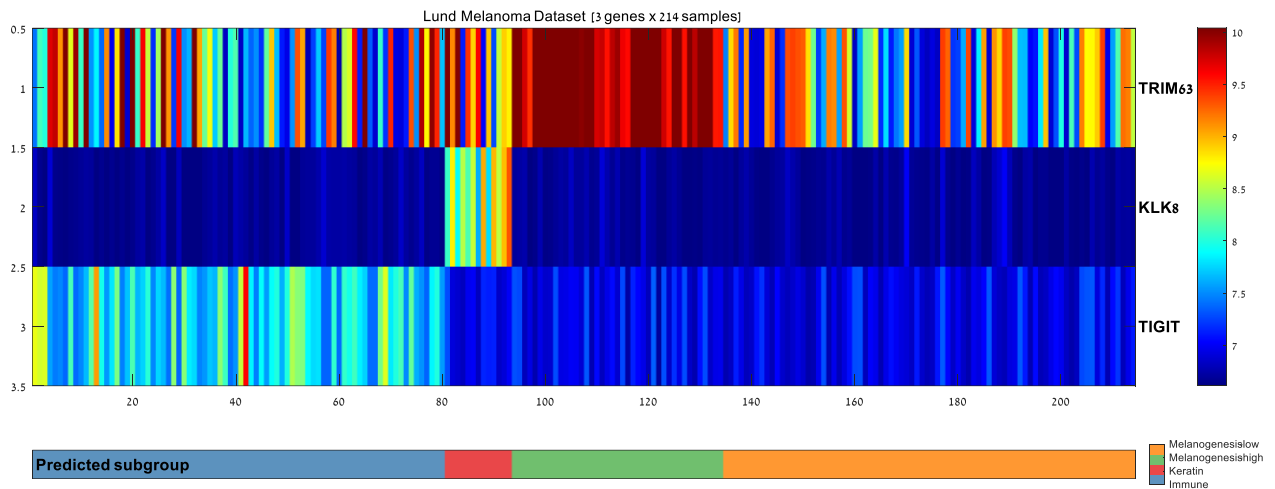

**Figure S16: Results of the predictions of the three-gene decision tree on the dataset of Cirenajwis et al.** The microarray dataset contained 214 melanoma samples, which were classified by the three-gene decision tree into the four melanoma subgroups: Immune (n=80), Keratin (n=13), Melanogenesis-low (n=80), and Melanogenesis-high (n=41).

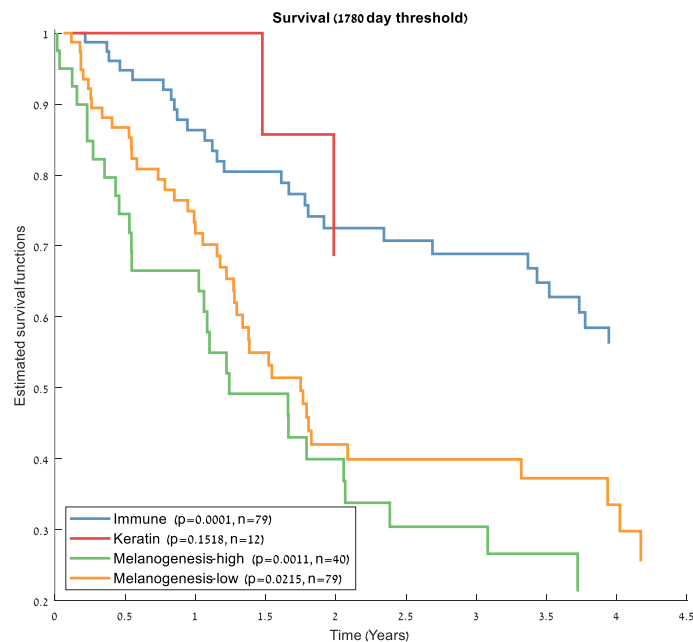

**Figure S17: Survival analysis for the four subgroups identified by the three-gene decision tree on the dataset of Cirenajwis et al.** The Immune (blue) and Melanogenesis-high (green) subgroups showed significant survival difference compared to the other groups, in agreement with their typical good and bad survival characteristics, respectively, on the TCGA dataset. The small Keratin (red) sample group showed the best survival curve on this dataset, which is what we would expect from a primary enriched subgroup (unlike

this group's worst survival on the TCGA data, which might be attributed to the size bias of the primary tumors in the TCGA melanoma cohort).

| Sample Id (GEO) | Call               | Sample Id (GEO) | Call               | Sample Id (GEO) | Call               |
|-----------------|--------------------|-----------------|--------------------|-----------------|--------------------|
| GSM1608593      | Immune             | GSM1608665      | Immune             | GSM1608737      | Melanogenesis-low  |
| GSM1608594      | Melanogenesis-low  | GSM1608666      | Immune             | GSM1608738      | Immune             |
| GSM1608595      | Keratin            | GSM1608667      | Melanogenesis-low  | GSM1608739      | Melanogenesis-low  |
| GSM1608596      | Immune             | GSM1608668      | Melanogenesis-high | GSM1608740      | Melanogenesis-low  |
| GSM1608597      | Melanogenesis-low  | GSM1608669      | Melanogenesis-high | GSM1608741      | Keratin            |
| GSM1608598      | Immune             | GSM1608670      | Immune             | GSM1608742      | Melanogenesis-low  |
| GSM1608599      | Immune             | GSM1608671      | Immune             | GSM1608743      | Melanogenesis-low  |
| GSM1608600      | Immune             | GSM1608672      | Melanogenesis-high | GSM1608744      | Melanogenesis-high |
| GSM1608601      | Immune             | GSM1608673      | Keratin            | GSM1608745      | Immune             |
| GSM1608602      | Melanogenesis-low  | GSM1608674      | Keratin            | GSM1608746      | Immune             |
| GSM1608603      | Keratin            | GSM1608675      | Melanogenesis-low  | GSM1608747      | Melanogenesis-low  |
| GSM1608604      | Immune             | GSM1608676      | Melanogenesis-low  | GSM1608748      | Melanogenesis-low  |
| GSM1608605      | Melanogenesis-low  | GSM1608677      | Immune             | GSM1608749      | Immune             |
| GSM1608606      | Immune             | GSM1608678      | Keratin            | GSM1608750      | Immune             |
| GSM1608607      | Melanogenesis-low  | GSM1608679      | Melanogenesis-low  | GSM1608751      | Melanogenesis-high |
| GSM1608608      | Melanogenesis-low  | GSM1608680      | Melanogenesis-low  | GSM1608752      | Melanogenesis-high |
| GSM1608609      | Immune             | GSM1608681      | Melanogenesis-high | GSM1608753      | Immune             |
| GSM1608610      | Melanogenesis-low  | GSM1608682      | Immune             | GSM1608754      | Immune             |
| GSM1608611      | Immune             | GSM1608683      | Melanogenesis-high | GSM1608755      | Immune             |
| GSM1608612      | Melanogenesis-high | GSM1608684      | Immune             | GSM1608756      | Melanogenesis-low  |
| GSM1608613      | Melanogenesis-low  | GSM1608685      | Melanogenesis-low  | GSM1608757      | Melanogenesis-high |
| GSM1608614      | Melanogenesis-low  | GSM1608686      | Melanogenesis-high | GSM1608758      | Melanogenesis-low  |
| GSM1608615      | Melanogenesis-low  | GSM1608687      | Immune             | GSM1608759      | Melanogenesis-low  |
| GSM1608616      | Immune             | GSM1608688      | Melanogenesis-low  | GSM1608760      | Melanogenesis-low  |
| GSM1608617      | Melanogenesis-high | GSM1608689      | Melanogenesis-high | GSM1608761      | Melanogenesis-low  |
| GSM1608618      | Melanogenesis-low  | GSM1608690      | Melanogenesis-low  | GSM1608762      | Melanogenesis-low  |
| GSM1608619      | Melanogenesis-low  | GSM1608691      | Melanogenesis-low  | GSM1608763      | Immune             |
| GSM1608620      | Melanogenesis-low  | GSM1608692      | Keratin            | GSM1608764      | Immune             |
| GSM1608621      | Melanogenesis-high | GSM1608693      | Immune             | GSM1608765      | Melanogenesis-low  |
| GSM1608622      | Melanogenesis-low  | GSM1608694      | Melanogenesis-high | GSM1608766      | Melanogenesis-high |
| GSM1608623      | Immune             | GSM1608695      | Immune             | GSM1608767      | Melanogenesis-high |
| GSM1608624      | Melanogenesis-low  | GSM1608696      | Immune             | GSM1608768      | Immune             |
| GSM1608625      | Immune             | GSM1608697      | Melanogenesis-low  | GSM1608769      | Immune             |
| GSM1608626      | Immune             | GSM1608698      | Immune             | GSM1608770      | Immune             |
| GSM1608627      | Melanogenesis-low  | GSM1608699      | Melanogenesis-high | GSM1608771      | Melanogenesis-high |
| GSM1608628      | Melanogenesis-high | GSM1608700      | Melanogenesis-low  | GSM1608772      | Melanogenesis-high |
| GSM1608629      | Melanogenesis-low  | GSM1608701      | Keratin            | GSM1608773      | Immune             |
| GSM1608630      | Melanogenesis-low  | GSM1608702      | Melanogenesis-low  | GSM1608774      | Melanogenesis-low  |
| GSM1608631      | Melanogenesis-low  | GSM1608703      | Immune             | GSM1608775      | Melanogenesis-low  |
| GSM1608632      | Melanogenesis-low  | GSM1608704      | Melanogenesis-high | GSM1608776      | Melanogenesis-high |
| GSM1608633      | Immune             | GSM1608705      | Immune             | GSM1608777      | Immune             |
| GSM1608634      | Immune             | GSM1608706      | Keratin            | GSM1608778      | Melanogenesis-low  |
| GSM1608635      | Melanogenesis-high | GSM1608707      | Melanogenesis-high | GSM1608779      | Immune             |
| GSM1608636      | Melanogenesis-low  | GSM1608708      | Immune             | GSM1608780      | Melanogenesis-high |
| GSM1608637      | Melanogenesis-high | GSM1608709      | Melanogenesis-low  | GSM1608781      | Immune             |
| GSM1608638      | Melanogenesis-low  | GSM1608710      | Melanogenesis-high | GSM1608782      | Immune             |
| GSM1608639      | Immune             | GSM1608711      | Melanogenesis-low  | GSM1608783      | Melanogenesis-low  |
| GSM1608640      | Melanogenesis-high | GSM1608712      | Melanogenesis-high | GSM1608784      | Melanogenesis-high |
| GSM1608641      | Immune             | GSM1608713      | Immune             | GSM1608785      | Melanogenesis-low  |
| GSM1608642      | Immune             | GSM1608714      | Melanogenesis-low  | GSM1608786      | Immune             |
| GSM1608643      | Melanogenesis-low  | GSM1608715      | Immune             | GSM1608787      | Keratin            |
| GSM1608644      | Melanogenesis-low  | GSM1608716      | Melanogenesis-low  | GSM1608788      | Melanogenesis-low  |
| GSM1608645      | Melanogenesis-high | GSM1608717      | Melanogenesis-high | GSM1608789      | Melanogenesis-high |
| GSM1608646      | Melanogenesis-low  | GSM1608718      | Melanogenesis-low  | GSM1608790      | Melanogenesis-high |
| GSM1608647      | Melanogenesis-low  | GSM1608719      | Immune             | GSM1608791      | Immune             |
| GSM1608648      | Immune             | GSM1608720      | Immune             | GSM1608792      | Immune             |
| GSM1608649      | Melanogenesis-high | GSM1608721      | Melanogenesis-low  | GSM1608793      | Immune             |
| GSM1608650      | Melanogenesis-low  | GSM1608722      | Immune             | GSM1608794      | Immune             |
| GSM1608651      | Melanogenesis-low  | GSM1608723      | Melanogenesis-low  | GSM1608795      | Immune             |
| GSM1608652      | Immune             | GSM1608724      | Melanogenesis-low  | GSM1608796      | Immune             |
| GSM1608653      | Immune             | GSM1608725      | Immune             | GSM1608797      | Keratin            |
| GSM1608654      | Keratin            | GSM1608726      | Melanogenesis-low  | GSM1608798      | Immune             |
| GSM1608655      | Melanogenesis-low  | GSM1608727      | Immune             | GSM1608799      | Immune             |
| GSM1608656      | Immune             | GSM1608728      | Melanogenesis-low  | GSM1608800      | Melanogenesis-high |
| GSM1608657      | Immune             | GSM1608729      | Melanogenesis-low  | GSM1608801      | Immune             |
| GSM1608658      | Immune             | GSM1608730      | Keratin            | GSM1608802      | Melanogenesis-high |
| GSM1608659      | Melanogenesis-low  | GSM1608731      | Immune             | GSM1608803      | Melanogenesis-low  |
| GSM1608660      | Melanogenesis-low  | GSM1608732      | Immune             | GSM1608804      | Melanogenesis-low  |
| GSM1608661      | Melanogenesis-high | GSM1608733      | Melanogenesis-low  | GSM1608805      | Immune             |
| GSM1608662      | Immune             | GSM1608734      | Melanogenesis-low  | GSM1608806      | Immune             |
| GSM1608663      | Melanogenesis-low  | GSM1608735      | Melanogenesis-high |                 |                    |
| GSM1608664      | Melanogenesis-high | GSM1608736      | Melanogenesis-low  |                 |                    |

**Table S7:** Predicted melanoma subgroup for the Lund dataset samples as called by three gene classifier.

## Acknowledgments

The results published here are based upon data generated by The Cancer Genome Atlas managed by the NCI and NHGRI. Information about TCGA can be found at <http://cancergenome.nih.gov>.

The Genotype-Tissue Expression (GTEx) Project was supported by the Common Fund of the Office of the Director of the National Institutes of Health, and by NCI, NHGRI, NHLBI, NIDA, NIMH, and NINDS.

Figure S7 was generated by the Human Protein Atlas, available from <http://www.proteinatlas.org>.

## References:

1. Netanel, D., Stern, N., Laufer, I. & Shamir, R. PROMO: an interactive tool for analyzing clinically-labeled multi-omic cancer datasets. *BMC Bioinformatics* **20**, 732 (2019).
2. Akbani, R. *et al.* Genomic Classification of Cutaneous Melanoma. *Cell* **161**, 1681–1696 (2015).
3. Shamir, R. *et al.* EXPANDER--an integrative program suite for microarray data analysis. *BMC Bioinformatics* **6**, 232 (2005).
4. Ulitsky, I. *et al.* Expander: from expression microarrays to networks and functions. *Nat. Protoc.* **5**, 303–22 (2010).
5. Kanehisa, M. & Goto, S. KEGG: kyoto encyclopedia of genes and genomes. *Nucleic Acids Res.* **28**, 27–30 (2000).
6. Uhlén, M. *et al.* Tissue-based map of the human proteome. *Science* (80-. ). (2015) doi:10.1126/science.1260419.
7. The Human Protein Atlas. <https://www.proteinatlas.org/>.
8. The Genotype-Tissue Expression (GTEx) project. <https://www.gtexportal.org/home/>.
9. The Functional Annotation of Mammalian Genomes 5. <https://fantom.gsc.riken.jp/5/>.
10. Lizio, M. *et al.* Gateways to the FANTOM5 promoter level mammalian expression atlas. *Genome Biol.* (2015) doi:10.1186/s13059-014-0560-6.
11. Lizio, M. *et al.* Update of the FANTOM web resource: Expansion to provide additional transcriptome atlases. *Nucleic Acids Res.* (2019) doi:10.1093/nar/gky1099.
12. Eden, E., Navon, R., Steinfeld, I., Lipson, D. & Yakhini, Z. GOrilla: a tool for discovery and visualization of enriched GO terms in ranked gene lists. *BMC Bioinformatics* **10**, 48 (2009).
13. Jönsson, G. *et al.* Gene expression profiling-based identification of molecular subtypes in stage IV melanomas with different clinical outcome. *Clin. Cancer Res.* **16**, 3356–67 (2010).
14. Nsengimana, J. *et al.* Independent replication of a melanoma subtype gene signature and evaluation of its prognostic value and biological correlates in a population cohort. *Oncotarget* **6**, 11683–93 (2015).
15. Cirenajwis, H. *et al.* Molecular stratification of metastatic melanoma using gene expression

- profiling : Prediction of survival outcome and benefit from molecular targeted therapy. *Oncotarget* **6**, 12297–12309 (2015).
16. Lauss, M., Nsengimana, J., Staaf, J., Newton-Bishop, J. & Jönsson, G. Consensus of Melanoma Gene Expression Subtypes Converges on Biological Entities. *J. Invest. Dermatol.* **136**, 2502–2505 (2016).
  17. Edgar, R., Domrachev, M. & Lash, A. E. Gene Expression Omnibus: NCBI gene expression and hybridization array data repository. *Nucleic Acids Res.* **30**, 207–10 (2002).
